# Supplementary material
Source: ML conference proceedings conference paper supplement (https://proceedings.neurips.cc/paper_files/paper/2023/hash/4b4f1272c73d5afd222b6dd3391c3f77-Abstract.html)
Supplement: Supplementary file 1 [file 4b4f1272c73d5afd222b6dd3391c3f77-Supplemental-Conference.pdf]

---

# –Supplementary Material–

## ConDaFormer: Disassembled Transformer with Local Structure Enhancement for 3D Point Cloud Understanding

---

Anonymous Author(s)

Affiliation

Address

email

### 1 S1 Ablation of window size

2 As stated in the main paper, our proposed disassembled window attention offers a notable advantage  
3 over the vanilla 3D cubic window attention by significantly reducing computational effort, enabling  
4 the potential enlargement of the receptive field through an increase in the window size. However, we  
5 also acknowledge a limitation of our ConDaFormer, which is the degradation in performance when  
6 utilizing a larger attention window. In this section, we present detailed ablation results to further  
7 investigate this issue. To assess the impact of window size on the performance of ConDaFormer,  
8 we conduct experiments using varying window sizes:  $\{0.32m, 0.48m, 0.64m\}$ , and present the  
9 corresponding results in Table S1. It is worth noting that as the window size expands, the training  
10 loss ( $Loss_t$ ) gradually decreases, and the performance on the training set ( $mIoU_t$ ) steadily improves.  
11 However, contrary to expectations, the performance on the validation set experiences a decline,  
12 indicating the occurrence of over-fitting. This phenomenon aligns with the observation made in  
13 LargeKernel [1] when increasing the convolutional kernel size. The introduction of a larger attention  
14 window incorporates additional positional embeddings, potentially resulting in optimization difficul-  
15 ties and leading to over-fitting. To address this issue, future research can explore techniques such  
16 as self-supervised or supervised pre-training on large-scale datasets. These approaches have shown  
17 promise in mitigating over-fitting and improving generalization performance. By leveraging such  
18 techniques, it is possible to enhance the robustness of ConDaFormer and enable the utilization of  
19 larger attention windows without suffering from performance degradation.

### 20 S2 Ablation of position encoding

21 To enhance the modeling of crucial position information necessary for self-attention learning, we  
22 employ the contextual relative position encoding (cRPE) scheme introduced by Stratified Trans-  
23 former [2]. In this context, we compare the performance of cRPE with two alternative position  
24 encoding schemes: Swin [3], wherein the learned relative position bias is directly added to the simi-  
25 larity between query and key, and PTv2 [4], which generates the position bias through an MLP that  
26 takes the relative position as input and subsequently adds it to the similarity between query and key.  
27 As shown in Table S2, cRPE outperforms the other schemes in two out of three metrics, indicating  
28 the significance of contextual features in effectively capturing fine-grained position information.

Table S1. Ablation of window size.

| Window | mIoU        | mAcc        | OA          | $Loss_t$    | $mIoU_t$    |
|--------|-------------|-------------|-------------|-------------|-------------|
| 0.32m  | <b>72.6</b> | <b>78.4</b> | <b>91.6</b> | 0.52        | 95.8        |
| 0.48m  | 72.1        | 78.3        | 91.5        | 0.47        | 96.0        |
| 0.64m  | 71.6        | 78.4        | 91.4        | <b>0.45</b> | <b>96.1</b> |

Table S2. Ablation of position encoding.

| Method | mIoU        | mAcc        | OA          |
|--------|-------------|-------------|-------------|
| cRPE   | <b>70.7</b> | <b>76.9</b> | 90.6        |
| Swin   | 69.6        | 76.1        | 90.6        |
| PTv2   | 70.1        | 76.4        | <b>91.2</b> |

## 29 References

- 30 [1] Yukang Chen, Jianhui Liu, Xiaojuan Qi, Xiangyu Zhang, Jian Sun, and Jiaya Jia. Scaling up kernels in 3d  
31 cnns. *Adv. Neural Inform. Process. Syst.*, 2022. 1
- 32 [2] Xin Lai, Jianhui Liu, Li Jiang, Liwei Wang, Hengshuang Zhao, Shu Liu, Xiaojuan Qi, and Jiaya Jia.  
33 Stratified transformer for 3d point cloud segmentation. In *IEEE Conf. Comput. Vis. Pattern Recog.*, pages  
34 8500–8509, 2022. 1
- 35 [3] Ze Liu, Yutong Lin, Yue Cao, Han Hu, Yixuan Wei, Zheng Zhang, Stephen Lin, and Baining Guo. Swin  
36 transformer: Hierarchical vision transformer using shifted windows. In *Int. Conf. Comput. Vis.*, 2021. 1
- 37 [4] Xiaoyang Wu, Yixing Lao, Li Jiang, Xihui Liu, and Hengshuang Zhao. Point transformer v2: Grouped  
38 vector attention and partition-based pooling. In *Adv. Neural Inform. Process. Syst.*, 2022. 1
